# Supplementary material
Source: HighWire-hosted journal article supplement (https://bmjopen.bmj.com/content/11/8/e050281)
Supplement: inline-supplementary-material-1 [file inline-supplementary-material-1.pdf]

**Pulmonary Thromboembolism in Hospitalised Patients with COVID-19: A Retrospective National Study of Patients Managed in Critical Care and Ward Environments in Scotland**  
**Supplementary Data**

**Dr M McGettrick (Michael.McGettrick@ggc.scot.nhs.uk)**, Scottish Pulmonary Vascular Unit,  
Golden Jubilee National Hospital, Glasgow, UK

**Dr A MacLellan (Alexander.MacLellan@ggc.scot.nhs.uk)**, Scottish Pulmonary Vascular Unit,  
Golden Jubilee National Hospital, Glasgow, UK

**Dr P McCaughey (Paul.McCaughey@ggc.scot.nhs.uk)**, Scottish Pulmonary Vascular Unit,  
Golden Jubilee National Hospital, Glasgow, UK

**Dr C Bagot (Catherine.Bagot@ggc.scot.nhs.uk)**, Dept of Haematology, Glasgow Royal  
Infirmary, Glasgow

**Dr M J Brewis (Melanie.Brewis@ggc.scot.nhs.uk)**, Scottish Pulmonary Vascular Unit,  
Golden Jubilee National Hospital, Glasgow, UK

**Dr N N Lang (Ninian.Lang@Glasgow.ac.uk)**, College of Medical, Veterinary and Life  
Sciences, University of Glasgow

**Dr M K Johnson (Martin.Johnson@ggc.scot.nhs.uk)**, Scottish Pulmonary Vascular Unit,  
Golden Jubilee National Hospital, Glasgow, UK

**Dr A C Church (Colin.Church@ggc.scot.nhs.uk)** Scottish Pulmonary Vascular Unit, Golden  
Jubilee National Hospital, Glasgow, UK

**Corresponding author**

**Dr M McGettrick**  
**Scottish Pulmonary Vascular Unit**  
**Golden Jubilee National Hospital**  
**Agamemnon Street**  
**Glasgow, UK**

Table 1. Univariate analysis of comorbidities in those with COVID-19

| Comorbidity            | Odds Ratio | Confidence interval | P-Value |
|------------------------|------------|---------------------|---------|
| Obesity                | 0.72       | 0.32 - 1.2          | 0.38    |
| Systemic Hypertension  | 1.01       | 0.31 - 3.1          | 0.99    |
| Diabetes               | 1.11       | 0.35 - 3.32         | 0.86    |
| Cardiovascular disease | 1.07       | 0.25 - 3.86         | 0.92    |
| Inflammatory diseases  | 0.61       | 0.03 - 4.44         | 0.67    |
| Malignancy             | 0.61       | 0.09 - 2.63         | 0.55    |

Table 2 Comorbidities of Critical Care patients and those in Level 1 Care

| Comorbidities          | All patients<br>n=192<br>(%) | Patients in Critical care<br>n=29<br>(%) | Patients in Level 1 care<br>n=163<br>(%) | P-value <sup>++</sup> |
|------------------------|------------------------------|------------------------------------------|------------------------------------------|-----------------------|
| Systemic Hypertension  | 36 (19)                      | 4 (13)                                   | 32 (20)                                  | 0.62                  |
| Malignancy             | 15 (8)                       | 1 (3)                                    | 14 (7)                                   | 0.25                  |
| Diabetes Mellitus      | 31 (16)                      | 3 (10)                                   | 28 (15)                                  | 0.54                  |
| Cardiovascular Disease | 19 (10)                      | 1 (3)                                    | 18 (11)                                  | 0.55                  |

|                                            |         |         |         |      |
|--------------------------------------------|---------|---------|---------|------|
| <b>Inflammatory conditions<sup>+</sup></b> | 6 (3)   | 2 (7)   | 4 (2)   | 0.23 |
| <b>BMI &gt;25</b>                          | 93 (48) | 16 (55) | 77 (47) | 0.48 |

<sup>+</sup> Inclusive of Inflammatory arthritis, inflammatory GI disorders

<sup>\*\*</sup>Chi-squared
